# Supplementary material for: Next-Generation Sequencing of Connective Tissue Genes in Patients with Classical Ehlers-Danlos Syndrome
Source: MDPI journal article supplement (doi:10.3390/cimb44040099), 2022-03-25
Supplement: s1 [file s1]

Table S1. Clinical findings of the 59 patients with cEDS (Supplementary Data).

| Patient number                 | Gene   | Variant            | Protein        | rs           | Varsome           | Major criteria           |                   |                                 | Minor criteria                                                                                | Other features                                                                                                                        |
|--------------------------------|--------|--------------------|----------------|--------------|-------------------|--------------------------|-------------------|---------------------------------|-----------------------------------------------------------------------------------------------|---------------------------------------------------------------------------------------------------------------------------------------|
|                                |        |                    |                |              |                   | Skin hiper-extensibility | Atrophic scarring | Generalized joint hypermobility |                                                                                               |                                                                                                                                       |
| 1                              | COL5A1 | c.1989+1G>T        | splice variant | not reported | Pathogenic        | (+)                      | (+)               | (+)                             | soft, velvety skin, easy bruising, dislocations of joints                                     | poor wound healing, feet valgity, gastroesophageal reflux, astigmatism                                                                |
| 2                              | COL5A1 | c.1273_1276dupAGTC | p.Ser426Ter    | not reported | Likely Pathogenic | (+)                      | (-)               | (+)                             | soft skin, hernias, epicanthal fold, joint pain                                               | delayed motor development, high palate                                                                                                |
| 3 (mother of patients 4 and 5) | COL5A1 | c.5021delC         | p.T1674Kfs*55  | not reported | Pathogenic        | (+)                      | (+)               | (+)                             | soft, velvety skin, easy bruising, dislocations of joints, joint pain, family history of cEDS | poor wound healing, chronic fatigue, preterm delivery (patient 4 and 5), coronary arterial disease and chronic duodenal ulcer disease |
| 4 (daughter of 3)              | COL5A1 | c.5021delC         | p.T1674Kfs*55  | not reported | Pathogenic        | (+)                      | (+)               | (+)                             | soft, velvety skin, easy bruising, dislocations of joints, joint pain, family history of cEDS | poor wound healing, arrhythmia, chronic fatigue                                                                                       |

|                                  |        |             |                    |              |                   |     |     |     |                                                                                               |                                                                                                                |
|----------------------------------|--------|-------------|--------------------|--------------|-------------------|-----|-----|-----|-----------------------------------------------------------------------------------------------|----------------------------------------------------------------------------------------------------------------|
| 5<br>(daughter of 3)             | COL5A1 | c.5021delC  | p.T1674Kfs*55      | not reported | Pathogenic        | (+) | (+) | (+) | soft, velvety skin, easy bruising, dislocations of joints, joint pain, family history of cEDS | poor wound healing, arrhythmia, mitral valve prolapse                                                          |
| 6 (mother of 7)                  | COL5A1 | c.4050dupC  | p.Gly1351Argfs*814 | not reported | Likely Pathogenic | (+) | (-) | (+) | velvety skin, easy bruising, dislocations of joints, joint pain                               | flatfoot, preterm delivery of a daughter (patient 7) in 36 hbd and a son born in 27 hbd (not tested for cEDS)  |
| 7<br>(daughter of 6)             | COL5A1 | c.4050dupC  | p.Gly1351Argfs*814 | not reported | Likely Pathogenic | (+) | (-) | (+) | soft, doughy skin, easy bruising, family history of cEDS                                      | congenital hip dysplasia, scoliosis, mitral valve prolapse                                                     |
| 8                                | COL5A1 | c.1726C>T   | p.Pro576Ser        | rs763246328  | Likely Benign     | (+) | (+) | (+) | dislocations of joints, whole body pain                                                       | -                                                                                                              |
|                                  | COL6A3 | c.6930+5G>A | splice variant     | rs749037028  | VUS               |     |     |     |                                                                                               |                                                                                                                |
| 9<br>(described in [7])          | COL5A1 | c.944C>T    | p.Thr315Met        | rs145093766  | Likely Benign     | (+) | (-) | (+) | pain, family history of cEDS                                                                  | flatfoot, scoliosis, chronic osteoporosis, short stature, muscle hypotonia, diarrhea, chronic fatigue syndrome |
| 10<br>(mother of patients 11-13) | COL5A1 | c.3023C>T   | p.Thr1008Met       | rs199735010  | Likely Benign     | (+) | (-) | (+) | soft, velvety skin, dislocations of joints, family                                            | varicose veins                                                                                                 |

|                                 |        |           |              |             |               |     |     |     |                                                                                      |                                                               |
|---------------------------------|--------|-----------|--------------|-------------|---------------|-----|-----|-----|--------------------------------------------------------------------------------------|---------------------------------------------------------------|
|                                 |        |           |              |             |               |     |     |     | history of cEDS                                                                      |                                                               |
| <b>11</b><br>(daughter of 10)   | COL5A1 | c.3023C>T | p.Thr1008Met | rs199735010 | Likely Benign | (+) | (+) | (+) | soft, velvety skin, dislocations of joints, epicanthal fold, positive family history | scoliosis                                                     |
| <b>12</b><br>(daughter of 10)   | COL5A1 | c.3023C>T | p.Thr1008Met | rs199735010 | Likely Benign | (+) | (+) | (+) | soft, velvety skin, dislocations of joints, joint pain, family history of cEDS       | scoliosis, Raynaud's syndrome                                 |
| <b>13</b><br>(daughter of 10)   | COL5A1 | c.3023C>T | p.Thr1008Met | rs199735010 | Likely Benign | (+) | (+) | (+) | soft, velvety skin, dislocations of joints, whole body pain, family history of cEDS  |                                                               |
| <b>14</b>                       | COL5A1 | c.3398G>A | p.Arg1133Gln | rs759580799 | Likely Benign | (+) | (+) | (+) | soft skin, dislocations of joints, joint pain                                        | scoliosis, mitral valve prolapse                              |
| <b>15</b><br>(described in [7]) | COL5A1 | c.1089C>G | p.Asn363Lys  | rs773870913 | Likely Benign | (+) | (-) | (+) | easy bruising, dislocations of joints, flat feet,                                    | -                                                             |
| <b>16</b><br>(described in [7]) | COL5A1 | c.193C>T  | p.Arg65Trp   | rs139468527 | Benign        | (+) | (-) | (+) | dislocations of joints, whole body pain                                              | feet valgity, osteoporosis, high palate                       |
|                                 | COL5A1 | c.514G>T  | p.Val172Phe  | rs150147262 | Likely Benign |     |     |     |                                                                                      |                                                               |
| <b>17</b><br>(described in [7]) | COL5A1 | c.367C>G  | p.Gln123Glu  | rs142114921 | Likely Benign | (+) | (-) | (+) | easy bruising, slow wound healing, joints dislocations                               | feet and knees valgity, high palate, chronic fatigue syndrome |

|                          |        |           |              |              |                   |     |     |     |                                                                             |                                                                                                                                                                      |
|--------------------------|--------|-----------|--------------|--------------|-------------------|-----|-----|-----|-----------------------------------------------------------------------------|----------------------------------------------------------------------------------------------------------------------------------------------------------------------|
| 18<br>(described in [7]) | COL5A1 | c.4483G>A | p.Gly1495Ser | not reported | VUS               | (+) | (-) | (+) | velvety skin, easy bruising, navel hernia, family history of cEDS           | knees and heels valgity, scoliosis, muscle hypotonia, delayed motor development, high palate, reflux gastrointestinal, blue sclera                                   |
| 19<br>(described in [7]) | COL5A1 | c.2588A>T | p.Glu863Val  | rs139788610  | Benign            | (+) | (-) | (+) | velvety skin, easy bruising, dislocations of joints, family history of cEDS | congenital hip dysplasia, flatfoot and valgus foot, scoliosis, delayed motor development, osteoporosis, arrhythmia, mitral insufficiency, gastrointestinal disorders |
|                          | COL5A1 | c.3418G>A | p.Val1140Met | rs149616140  | Benign            |     |     |     |                                                                             |                                                                                                                                                                      |
| 20<br>(described in [7]) | COL5A1 | c.3418G>A | p.Val1140Met | rs149616140  | Benign            | (+) | (-) | (+) | velvety skin, dislocations of joints, family history of cEDS                | -                                                                                                                                                                    |
| 21                       | COL5A2 | c.2555G>A | p.Gly852Asp  | not reported | Likely Pathogenic | (+) | (-) | (+) | soft, velvety skin, hernias, epicanthal fold                                | stretch marks, irritable bowel syndrome, bradycardia                                                                                                                 |
| 22                       | COL1A1 | c.2451T>C | p.Pro817=    | rs374465457  | Likely Pathogenic | (+) | (+) | (+) | soft, velvety skin, easy bruising, dislocations of joints, whole body pain, | -                                                                                                                                                                    |

|    |        |             |                |              |        |     |     |     |                                                                                                 |                                                                                                                                                                                                   |
|----|--------|-------------|----------------|--------------|--------|-----|-----|-----|-------------------------------------------------------------------------------------------------|---------------------------------------------------------------------------------------------------------------------------------------------------------------------------------------------------|
|    |        |             |                |              |        |     |     |     | family history of cEDS                                                                          |                                                                                                                                                                                                   |
| 23 | COL1A1 | c.517G>A    | p.Gly173Arg    | rs193922157  | VUS    | (+) | (+) | (+) | easy bruising, dislocations of joints, family history of cEDS                                   | irritable bowel syndrome, mitral insufficiency, migraines, myopia, marfanoid habitus, ADHD (in childhood), suspicion of bleeding disorders                                                        |
| 24 | COL1A1 | c.1984-5C>A | splice variant | rs66592376   | Benign | (+) | (+) | (+) | soft, velvety skin, easy bruising with delayed wound healing dislocations of joints, joint pain | delayed motor development, high palate, pigeon chest (pectus carinatum), ADHD, a tendency to self-injury, hypersensitivity to sounds, MCAS (Mast Cell Activation Syndrome), mitral valve prolapse |
| 25 | COL1A2 | c.601C>A    | p.Pro201Thr    | not reported | VUS    | (+) | (+) | (+) | easy bruising, velvety skin, dislocations of joints, joint pain, and whole body pain            | delayed wound healing, stretch marks, gastroesophageal reflux, irritable bowel disease, scoliosis, osteoporosis, osteomalacia,                                                                    |
|    | COL1A2 | c.661G>A    | p.Gly221Ser    | not reported | VUS    |     |     |     |                                                                                                 |                                                                                                                                                                                                   |

|    |        |           |              |              |     |     |     |     |                                                                                                                      |                                                                                                                                                                                                     |
|----|--------|-----------|--------------|--------------|-----|-----|-----|-----|----------------------------------------------------------------------------------------------------------------------|-----------------------------------------------------------------------------------------------------------------------------------------------------------------------------------------------------|
|    |        |           |              |              |     |     |     |     |                                                                                                                      | chondromalacia, gluten intolerance                                                                                                                                                                  |
| 26 | COL1A2 | c.3706A>G | p.Ser1236Gly | rs781184808  | VUS | (+) | (-) | (+) | soft, velvety, doughy skin,                                                                                          | collarbone fracture (1x), pigeon chest (pectus carinatum), blue sclera flatfoot, valgus knees                                                                                                       |
| 27 | COL1A2 | c.2776C>T | p.Arg926Cys  | rs745363291  | VUS | (+) | (+) | (+) | soft, velvety skin, easy bruising, dislocations of joints, joint pain                                                | delayed wound healing, hand fracture in childhood (1x), hyperalgesia, pigeon chest (pectus carinatum), gothic palate, irritable bowel disease, POTS (Postural Tachycardia Syndrome), depressed mood |
| 28 | COL1A2 | c.118C>A  | p.Pro40Thr   | rs1363689462 | VUS | (+) | (+) | (+) | soft, velvety, doughy skin, easy bruising, delayed wound healing, dislocations of joints, joints and whole body pain | gastroesophageal reflux, irritable bowel syndrome                                                                                                                                                   |
| 29 | COL1A2 | c.2642A>C | p.Glu881Ala  | rs751201659  | VUS | (+) | (-) | (+) | soft, velvety skin, easy bruising,                                                                                   | gastroesophageal reflux, hernia,                                                                                                                                                                    |

|    |             |           |              |             |        |         |         |         |                                                                                               |                                                             |
|----|-------------|-----------|--------------|-------------|--------|---------|---------|---------|-----------------------------------------------------------------------------------------------|-------------------------------------------------------------|
|    |             |           |              |             |        |         |         |         | delayed wound healing, hernias, dislocations of joints, joint pain                            | blue sclera, depressed mood                                 |
| 30 | COL1A2      | c.3313G>A | p.Gly1105Ser | rs139851311 | VUS    | (+) (-) | (+) (-) | (+) (-) | soft, velvety skin, easy bruising                                                             | gothic palate                                               |
|    | COL6A3      | c.4184G>A | p.Arg1395Gln | rs80272723  | Benign |         |         |         |                                                                                               |                                                             |
|    | NOTCH1      | c.3142C>T | p.Pro1048Ser | rs770521856 | VUS    |         |         |         |                                                                                               |                                                             |
| 31 | no mutation | -         | -            | -           | -      | (+)     | (+)     | (+)     | easy bruising, dislocations of joints                                                         | delayed wound healing, POTS (Postural Tachycardia Syndrome) |
| 32 | no mutation | -         | -            | -           | -      | (+)     | (-)     | (+)     | soft, velvety skin, hernias, stretch mark, joint pain                                         | irritable bowel syndrome                                    |
| 33 | no mutation | -         | -            | -           | -      | (+)     | (+)     | (+)     | soft, and velvety skin, dislocations of joints, joint pain                                    | flatfoot, blue sclera                                       |
| 34 | no mutation | -         | -            | -           | -      | (+)     | (+)     | (+)     | soft, doughy skin, easy bruising, hernias, dislocations of joints, joints and whole body pain | delayed wound healing                                       |
| 35 | no mutation | -         | -            | -           | -      | (+)     | (+)     | (+)     | soft, velvety skin, dislocations of joints, joint pain                                        | Raynaud's syndrome                                          |

|    |             |   |   |   |   |     |     |     |                                                                                    |                                                                          |
|----|-------------|---|---|---|---|-----|-----|-----|------------------------------------------------------------------------------------|--------------------------------------------------------------------------|
| 36 | no mutation | - | - | - | - | (+) | (-) | (+) | soft, velvety skin, dislocations of joints, joint pain                             | varicose veins, Raynaud's syndrome                                       |
| 37 | no mutation | - | - | - | - | (+) | (+) | (+) | soft, velvety, easy bruising skin, dislocations of joints, joint pain              | poor wound healing, mitral valve prolapse                                |
| 38 | no mutation | - | - | - | - | (+) | (+) | (+) | soft skin, hernias, dislocations of joints, joint pain                             | flatfoot, scoliosis                                                      |
| 39 | no mutation | - | - | - | - | (+) | (-) | (+) | soft, velvety skin, easy bruising with hernias, dislocations of joints, joint pain | delayed wound healing, flatfoot, gastroesophageal reflux, blue sclera    |
| 40 | no mutation | - | - | - | - | (+) | (-) | (+) | soft skin, hernias, epicanthal fold, joint pain                                    | delayed motor development, high palate, blue sclera                      |
| 41 | no mutation | - | - | - | - | (+) | (+) | (+) | dislocations of joints, whole body pain                                            | POTS                                                                     |
| 42 | no mutation | - | - | - | - | (+) | (+) | (+) | soft, velvety, doughy skin, dislocations of joints, pain of joints and whole body  | delayed wound healing, gastroesophageal reflux, irritable bowel syndrome |
| 43 | no mutation | - | - | - | - | (+) | (-) | (+) | soft, and velvety skin,                                                            | stretch marks, irritable bowel                                           |



|    |             |   |   |   |   |     |     |     |                                                                                                                      |                                                      |
|----|-------------|---|---|---|---|-----|-----|-----|----------------------------------------------------------------------------------------------------------------------|------------------------------------------------------|
|    |             |   |   |   |   |     |     |     | hernias, joint pain                                                                                                  | syndrome, blue sclera                                |
| 44 | no mutation | - | - | - | - | (+) | (+) | (+) | soft, doughy skin easy bruising, hernias, epicanthal fold, dislocations of joints, the pain of joints and whole body | gastroesophageal reflux, blue sclera                 |
| 45 | no mutation | - | - | - | - | (+) | (+) | (+) | dislocations of joints, joints and whole body pain, hernias                                                          | -                                                    |
| 46 | no mutation | - | - | - | - | (+) | (-) | (+) | soft, velvety skin, easy bruising with, hernias, dislocations of joints, joint pain                                  | delayed wound healing, varicose veins, blue sclera   |
| 47 | no mutation | - | - | - | - | (+) | (+) | (+) | soft, velvety skin, dislocations of joints, joint pain                                                               | delayed wound healing, gastroesophageal reflux       |
| 48 | no mutation | - | - | - | - | (+) | (-) | (+) | soft, and velvety skin, hernias, epicanthal fold                                                                     | stretch marks, irritable bowel syndrome, arrhythmia  |
| 49 | no mutation | - | - | - | - | (+) | (-) | (+) | soft, velvety skin, hernias, joint pain                                                                              | stretch marks, flatfoot, arrhythmia, irritable bowel |

|    |             |   |   |   |   |     |     |     |                                                                                                    |                                                     |
|----|-------------|---|---|---|---|-----|-----|-----|----------------------------------------------------------------------------------------------------|-----------------------------------------------------|
|    |             |   |   |   |   |     |     |     |                                                                                                    | syndrome, blue sclera                               |
| 50 | no mutation | - | - | - | - | (+) | (+) | (+) | soft, doughy skin, easy bruising, hernias, dislocations of joints, joint pain                      | gastroesophageal reflux                             |
| 51 | no mutation | - | - | - | - | (+) | (+) | (+) | soft, doughy skin, easy bruising, hernias, dislocations of joints                                  | food intolerance                                    |
| 52 | no mutation | - | - | - | - | (+) | (-) | (+) | soft, velvety skin, dislocations of joints, joint pain,                                            | varicose veins, Raynaud's syndrome, blue sclera     |
| 53 | no mutation | - | - | - | - | (+) | (+) | (+) | soft, velvety skin, easy bruising, dislocations of joints, whole body pain, family history of cEDS | -                                                   |
| 54 | no mutation | - | - | - | - | (+) | (-) | (+) | soft skin, hernias, epicanthal fold, joint pain                                                    | delayed motor development, high palate, blue sclera |
| 55 | no mutation | - | - | - | - | (+) | (+) | (+) | soft, velvety skin, dislocations of joints                                                         | delayed wound healing, gastroesophageal reflux      |

|    |             |   |   |   |   |     |     |     |                                                                                                    |                                                                                                      |
|----|-------------|---|---|---|---|-----|-----|-----|----------------------------------------------------------------------------------------------------|------------------------------------------------------------------------------------------------------|
| 56 | no mutation | - | - | - | - | (+) | (-) | (+) | soft, velvety skin, hernias, joint pain                                                            | delayed wound healing, stretch marks, irritable bowel syndrome, gastroesophageal reflux, blue sclera |
| 57 | no mutation | - | - | - | - | (+) | (-) | (+) | soft, velvety skin, easy bruising with delayed hernias, dislocations of joints, joint pain         | wound healing, gastroesophageal reflux, blue sclera                                                  |
| 58 | no mutation | - | - | - | - | (+) | (-) | (+) | soft skin, hernias, epicanthal fold, joint pain                                                    | delayed motor development, high palate                                                               |
| 59 | no mutation | - | - | - | - | (+) | (+) | (+) | soft, velvety skin, easy bruising, dislocations of joints, whole body pain, family history of cEDS | -                                                                                                    |

Legend: (+) clinical feature detected, (-) clinical feature not detected, - do not concern
